# Supplementary material for: Distribution and symmetrical patellofemoral pain patterns as revealed by high-resolution 3D body mapping: a cross-sectional study
Source: Springer Nature journal article supplement (doi:10.1186/s12891-017-1521-5), 2017-04-18

# Individual PFP drawings

*Symptom duration of less than 5 years.*

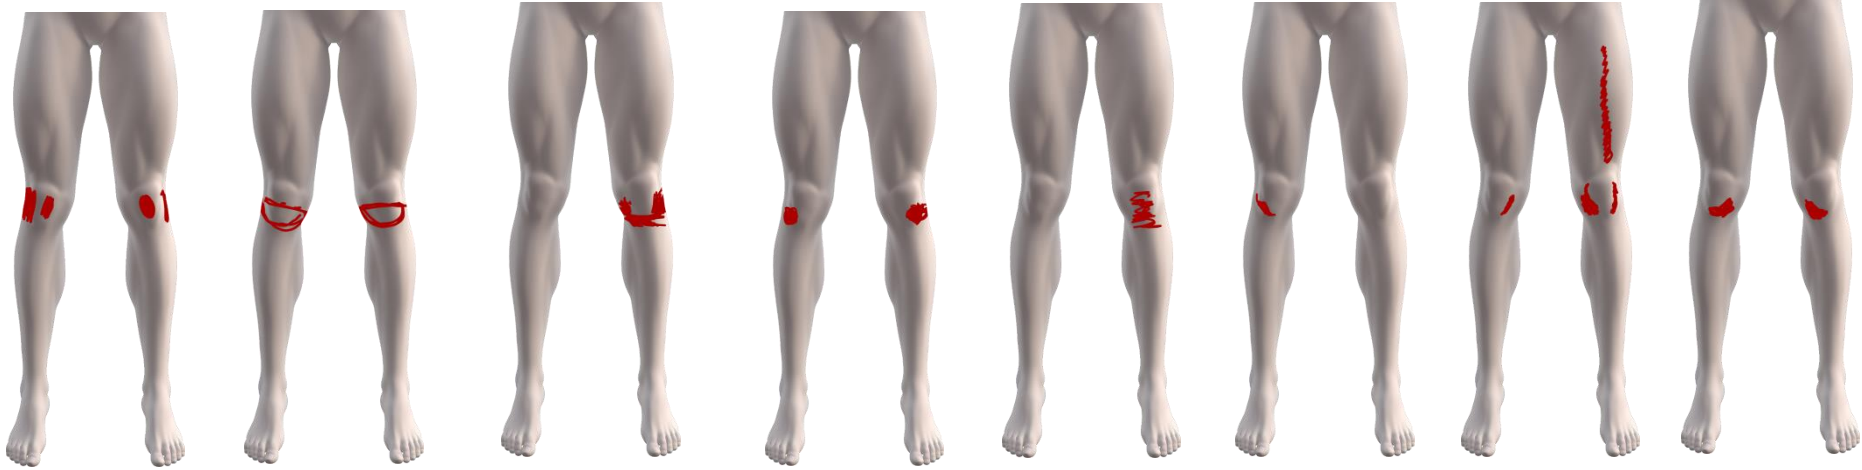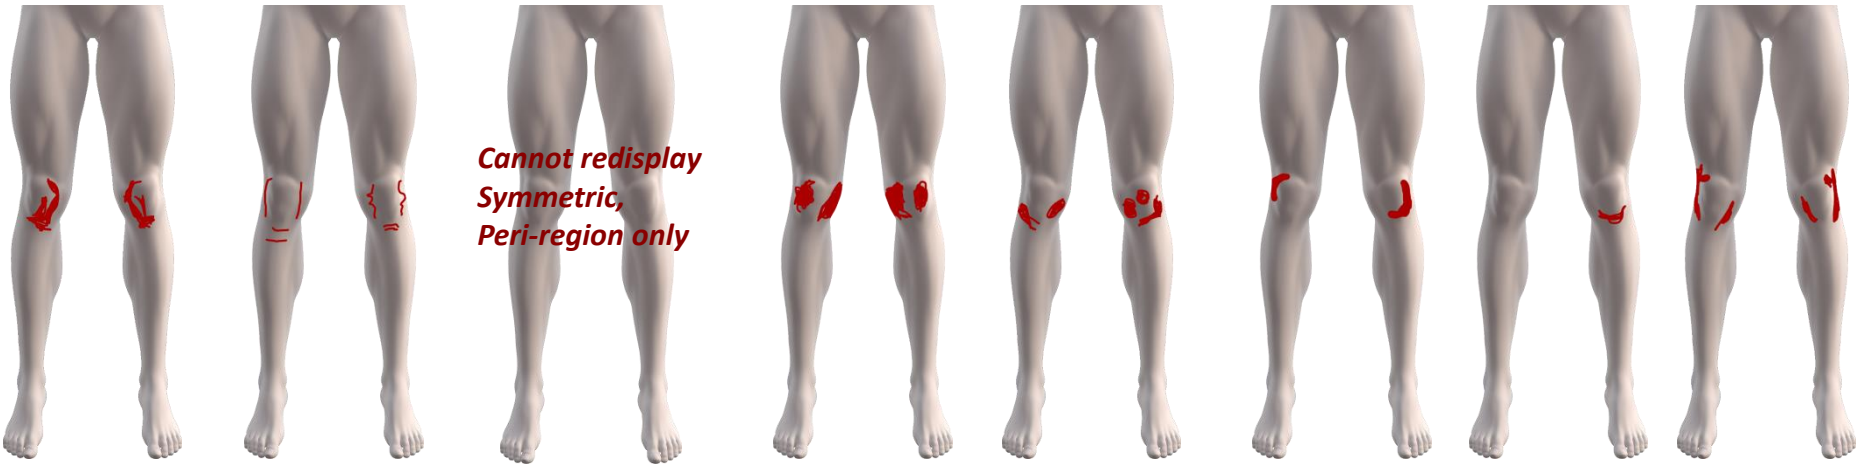

# Individual PFP drawings

*Symptom duration of more than 5 years.*

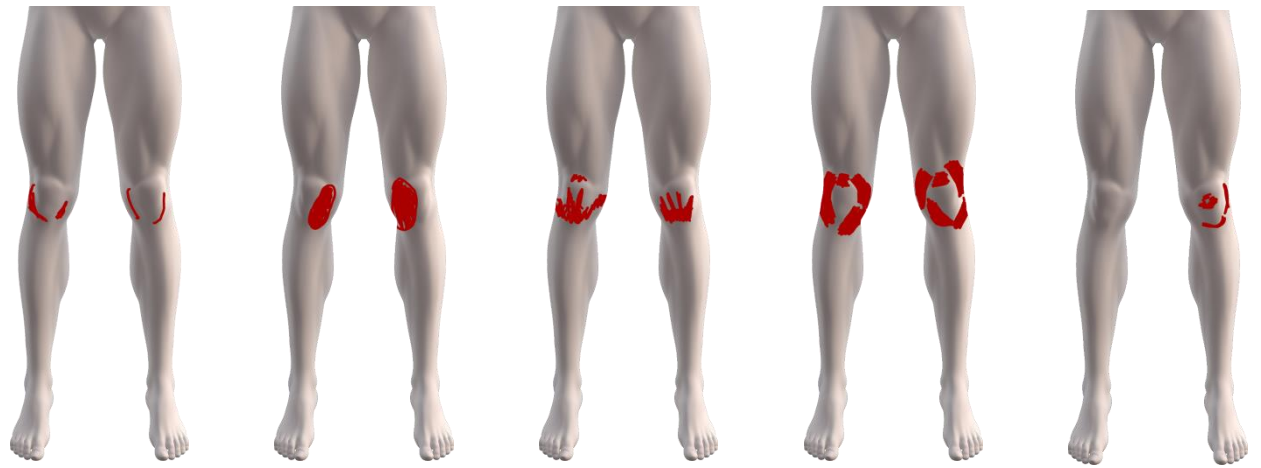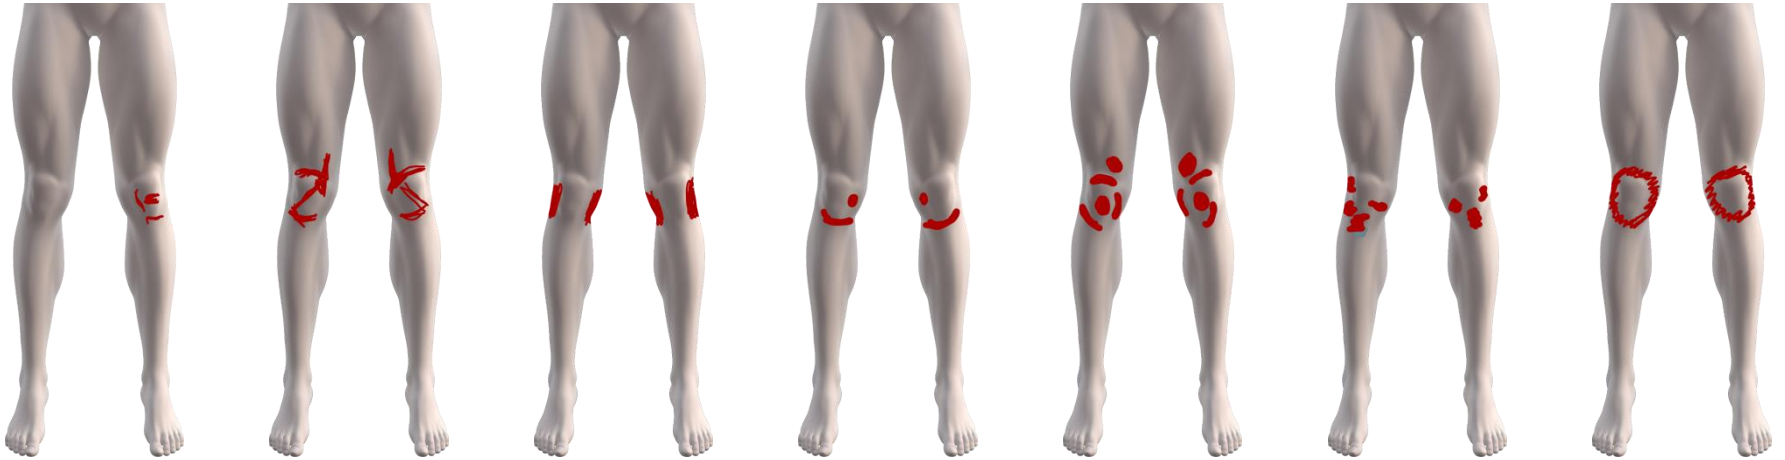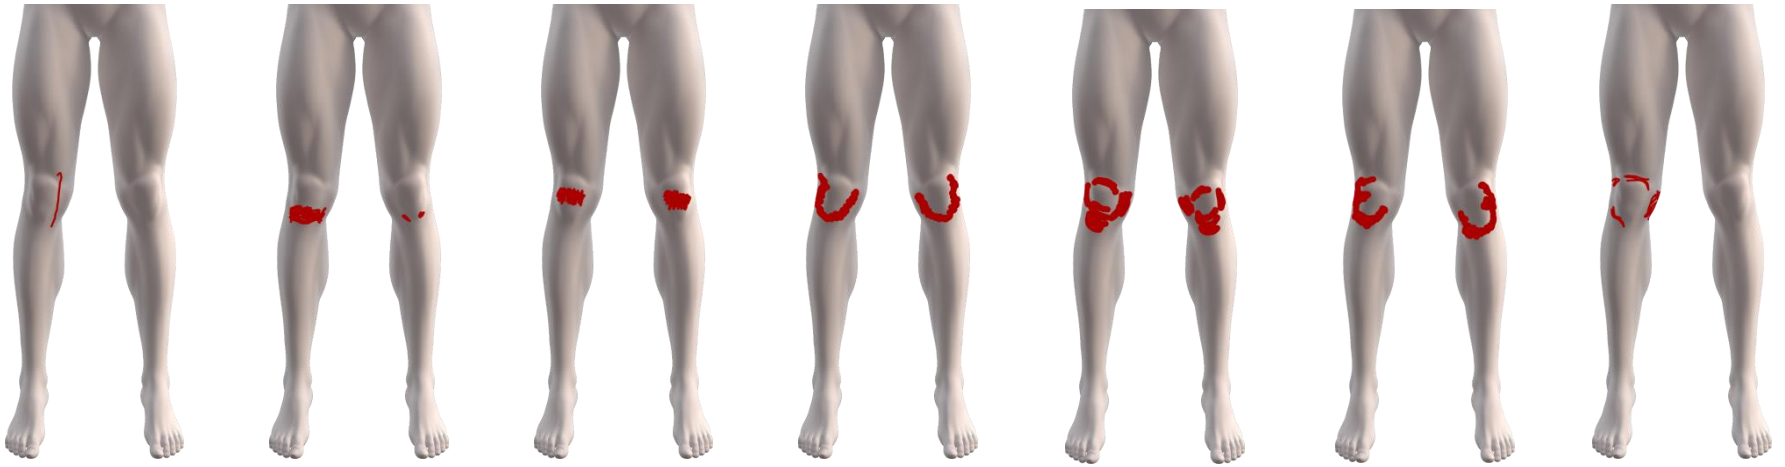

Supplement: MOESM1 [file 12231202]
